## Corrections

*Amylin regulation of carbohydrate metabolism*

By A. YOUNG, R. PITTNER, B. GEDULIN,  
W. VINE and T. RINK

Volume 23 No. 2 (1995) 325–331

The zip code should read '92121'. On the thirteenth line from the top of the right-hand column, 'prohuman amylin' should read 'tri-proline human amylin'.

*Investigation into the mechanisms of complement-mediated cytotoxicity in pancreatic  $\beta$  cells*

By E. M. CARAHER and P. NEWSHOLME

Volume 24 No. 1 (1996) 72S

The following acknowledgement should have appeared:  
This work was supported by a Science and Technology Forbairt grant (SC/93/024) and a research grant from the Irish Diabetic Association.

*Investigation of the inhibition of complement-mediated cell death*

By C. E. O'TOOLE and P. NEWSHOLME

Volume 24 No. 1 (1996) 150S

The following acknowledgement should have appeared:  
This work was supported by a Science and Technology Forbairt grant (SC/93/024) and a research grant from the Irish Diabetic Association.

*Chemoattractants activate ERK2 in Dictyostelium discoideum by diverse signalling pathways*

By C. KOSAKA and C. PEARS

Volume 24 No. 4 (1996) 581S F17

In the second sentence of the Results section, 'rasD' should read 'rasG'.

*Oligodendrocyte death induced by recombinant human interleukin-2*

By L. CURATOLO, B. VALSASINA,  
C. CACCIA, G. ORSINI and A. BIANCHETTI

Volume 24 No. 4 (1996) 604S H45

List of authors should read:  
L. CURATOLO, B. VALSASINA, L. RAIMONDI, C. CACCIA, G. ORSINI and A. BIANCHETTI

In the address 'CNS Biology/Bioscience' should read 'CNS Biology/Oncology'.
